# Supplementary material for: Pre-clinical evaluation of a quadrivalent HCV VLP vaccine in pigs following microneedle delivery
Source: PubMed Central journal article supplement (PMC6592879; doi:10.1038/s41598-019-45461-z), 2019-06-25

**Pre-clinical evaluation of a quadrivalent HCV VLP vaccine in pigs following microneedle delivery**

D Christiansen<sup>1</sup>, L Earnest-Silveira<sup>1</sup>, B Grubor-Bauk<sup>2</sup>, DK Wijesundara<sup>2</sup>, I Boo<sup>3</sup>, PA Ramsland<sup>3,4,5,6</sup>, E Vincan<sup>7</sup>, HE Drummer<sup>3,8</sup>, EJ Gowans<sup>2</sup>, J Torresi<sup>1</sup>

<sup>1</sup>Department of Microbiology and Immunology, The Peter Doherty Institute for Infection and Immunity, University of Melbourne, Parkville, Victoria, Australia

<sup>2</sup>Department of Surgery, The University of Adelaide and The Basil Hetzel Institute for Translational Health Research, Adelaide, South Australia, Australia

<sup>3</sup>Burnet Institute, Melbourne, Victoria, Australia

<sup>4</sup>School of Science, College of Science, Engineering and Health, RMIT University, Melbourne, Victoria, Australia

<sup>5</sup>Department of Surgery Austin Health, University of Melbourne, Heidelberg, Victoria, Australia

<sup>6</sup>Department of Immunology, Central Clinical School, Monash University, Melbourne, Victoria, Australia

<sup>7</sup>The Peter Doherty Institute for Infection and Immunity, University of Melbourne, Parkville, Victoria, Australia

<sup>8</sup>Department of Microbiology, Monash University, Clayton, Australia

#### Supplementary Figure 1

Cross-neutralization of HCV Gt1a VLP entry into Huh7 cells. Inhibition was determined following preincubation of FITC labelled Gt1a VLP with pig serum (diluted 1:80-1:2560) collected at each time point throughout the duration of the experiment. Light to dark green colour gradation represents percentage inhibition, with the darker shades showing higher neutralization. Numerical values represent the mean value calculated from triplicate samples at each time point.

#### Supplementary Figure 2

Cross-neutralization of HCV Gt1b VLP entry into Huh7 cells.

#### Supplementary Figure 3

Cross-neutralization of HCV Gt2a VLP entry into Huh7 cells.

#### Supplementary Figure 4

Cross-neutralization of HCV Gt3a VLP entry into Huh7 cells.

#### Supplementary Figure 5

B cell response from individual pigs following immunization with quadrivalent vaccine. ELISpot assay showing the number of memory B cells for individual pigs from the start (d0) through to the completion of the experiment (d84). The mean value (black circle) and standard deviation is shown, calculated from triplicate samples at each time point.

Pig 10 Gt 1a

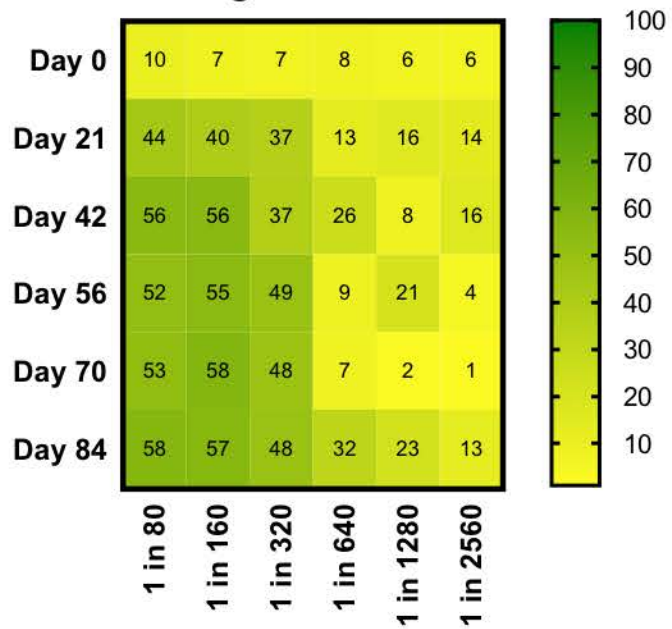

Pig 11 Gt 1a

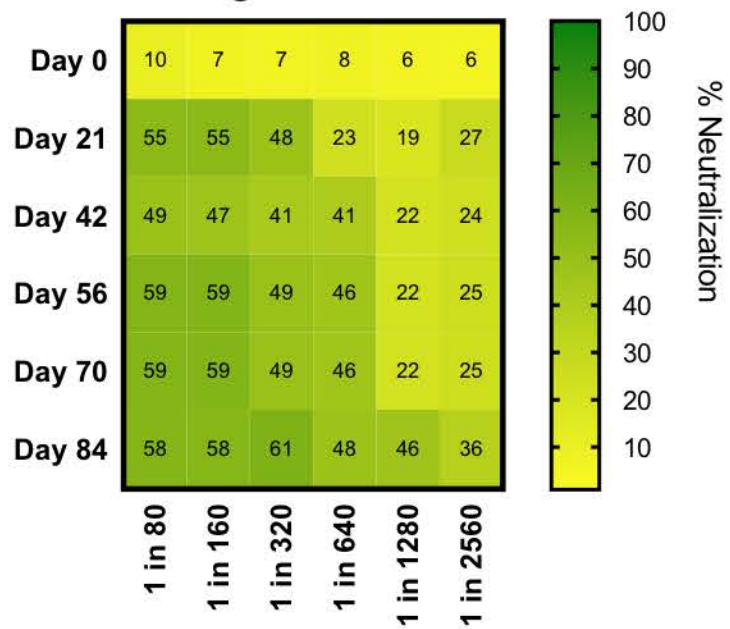

Pig 12 Gt 1a

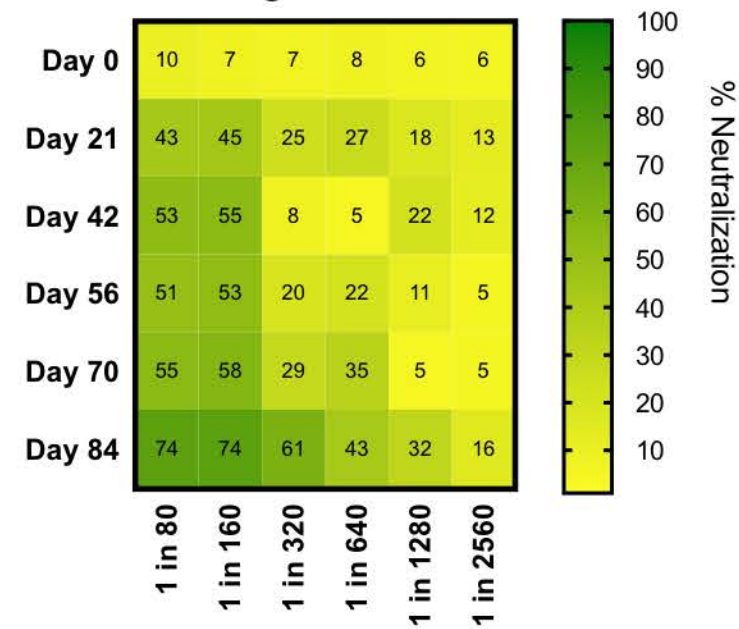

Pig 10 Gt 1b

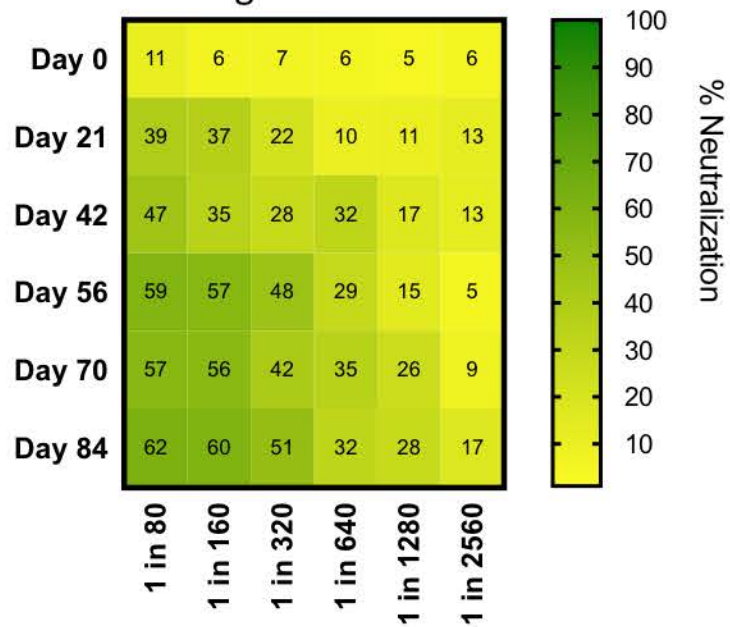

Pig 11 Gt 1b

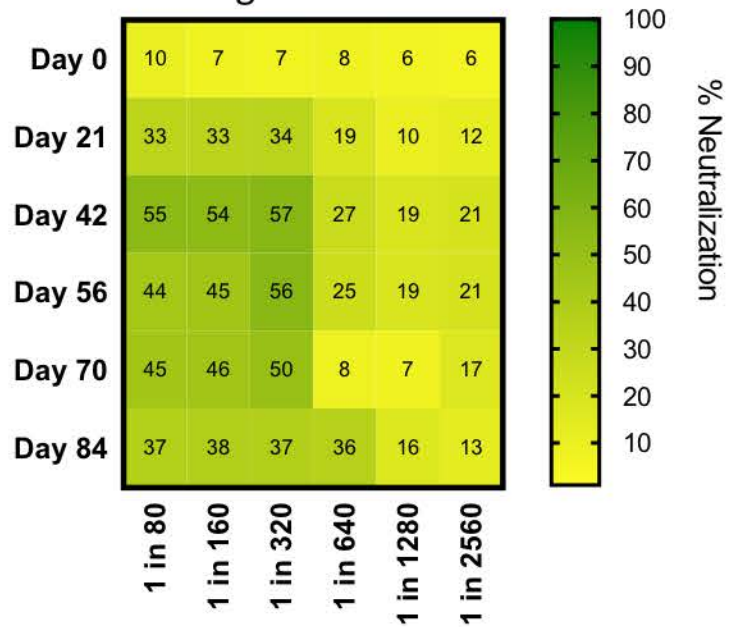

Pig 12 Gt 1b

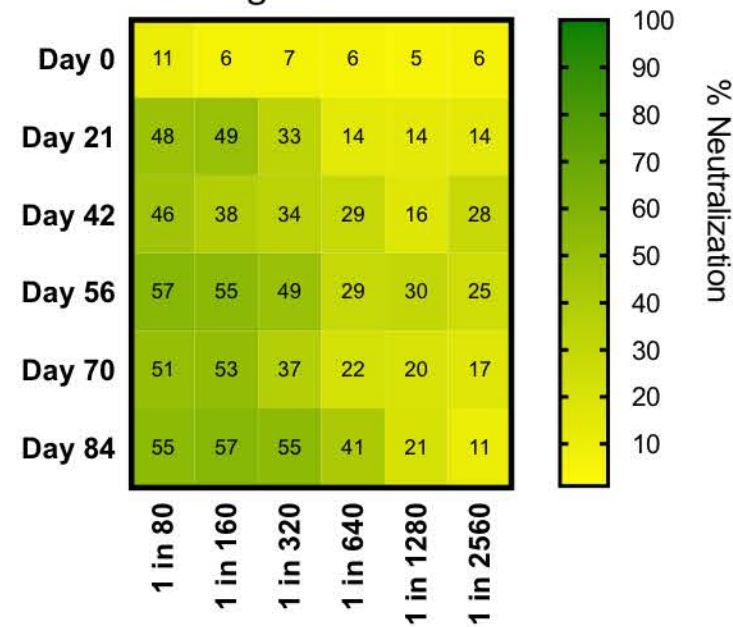

Pig 10 Gt 2a

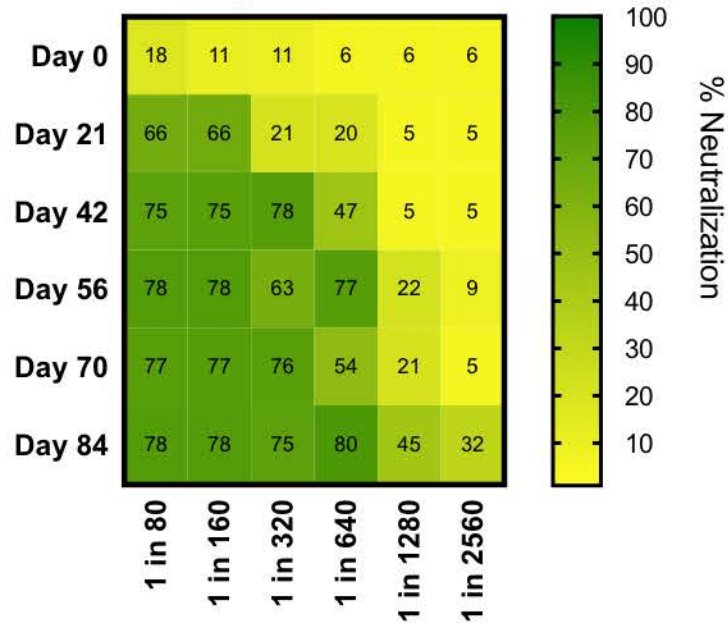

Pig 11 Gt 2a

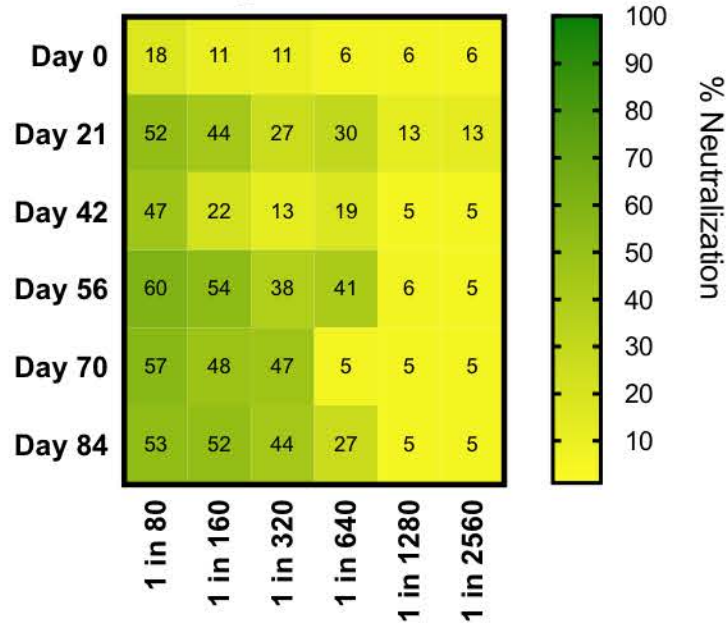

Pig 12 Gt 2a

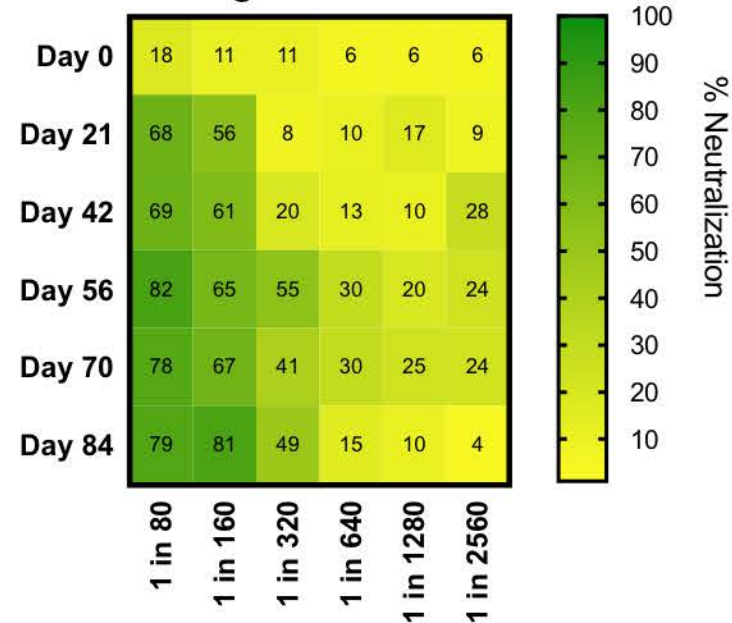

Pig 10 Gt 3a

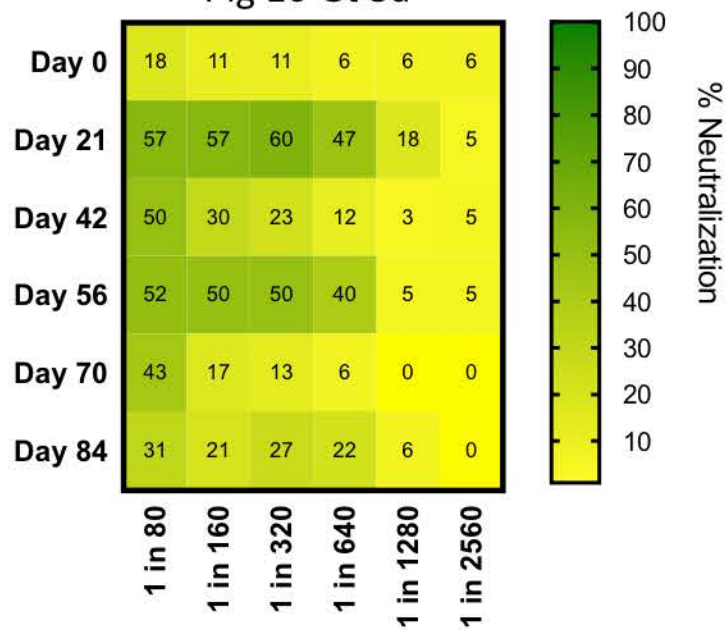

Pig 11 Gt 3a

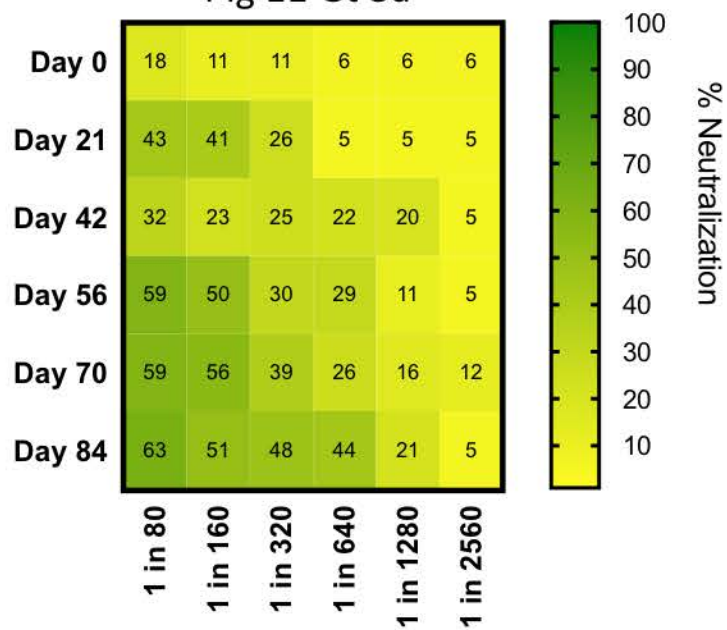

Pig 12 Gt 3a

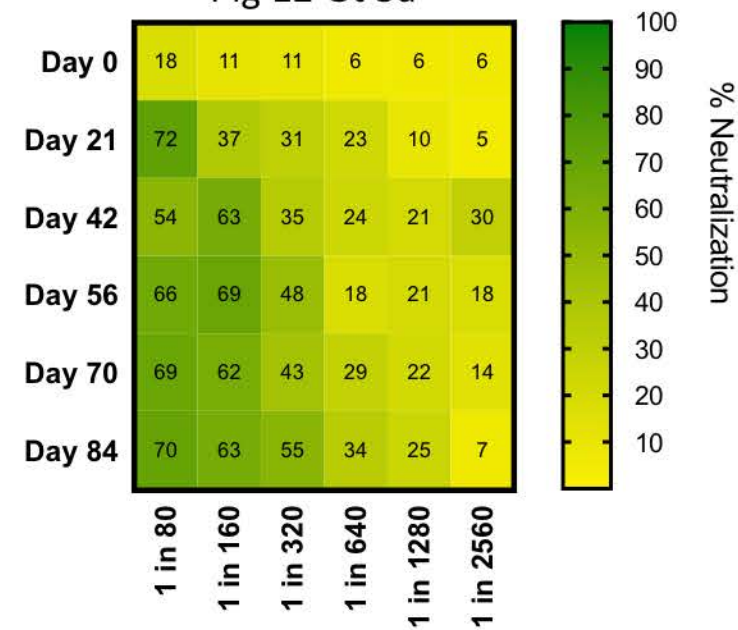

Pig 10

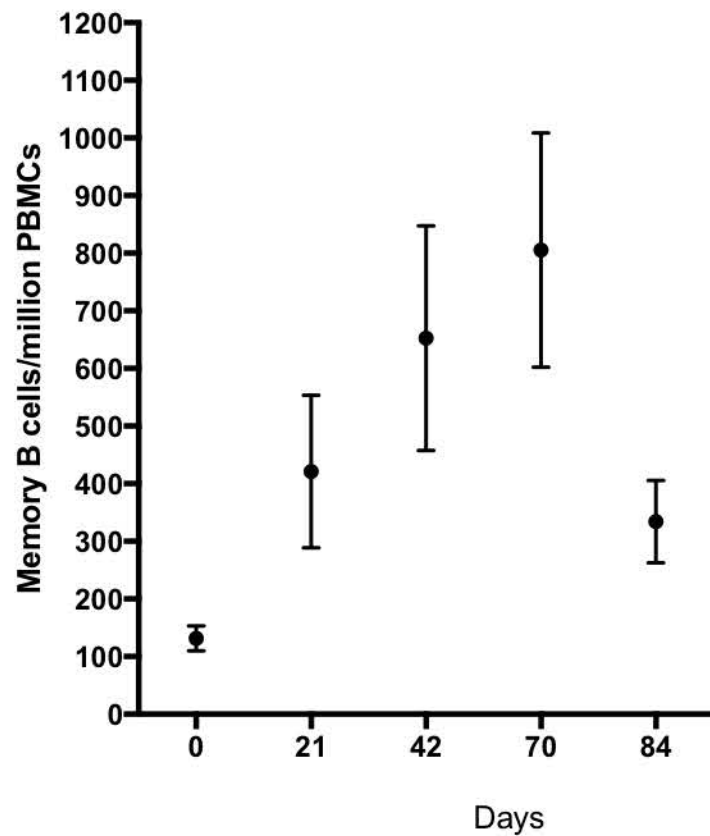

Pig 11

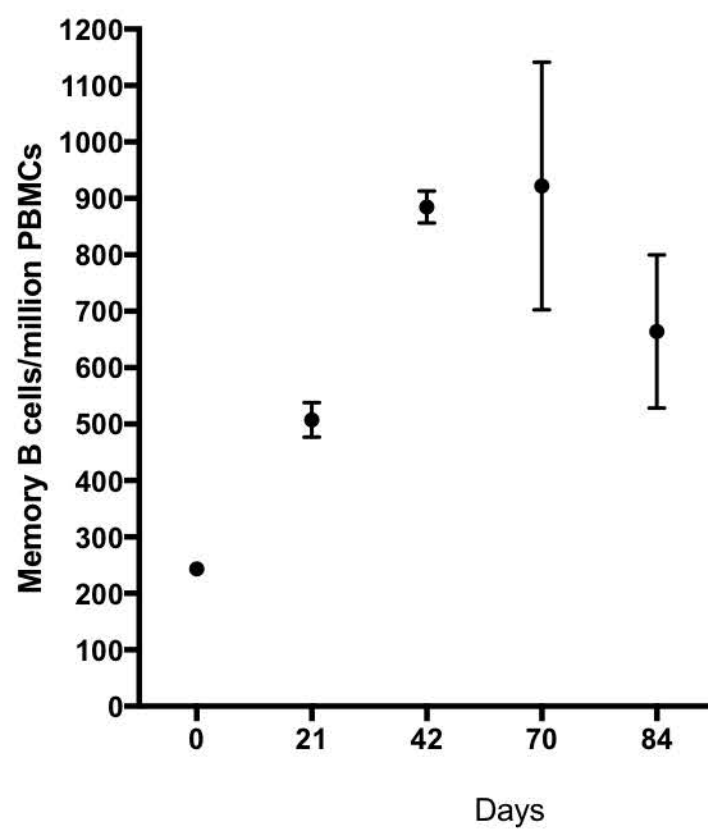

Pig 12

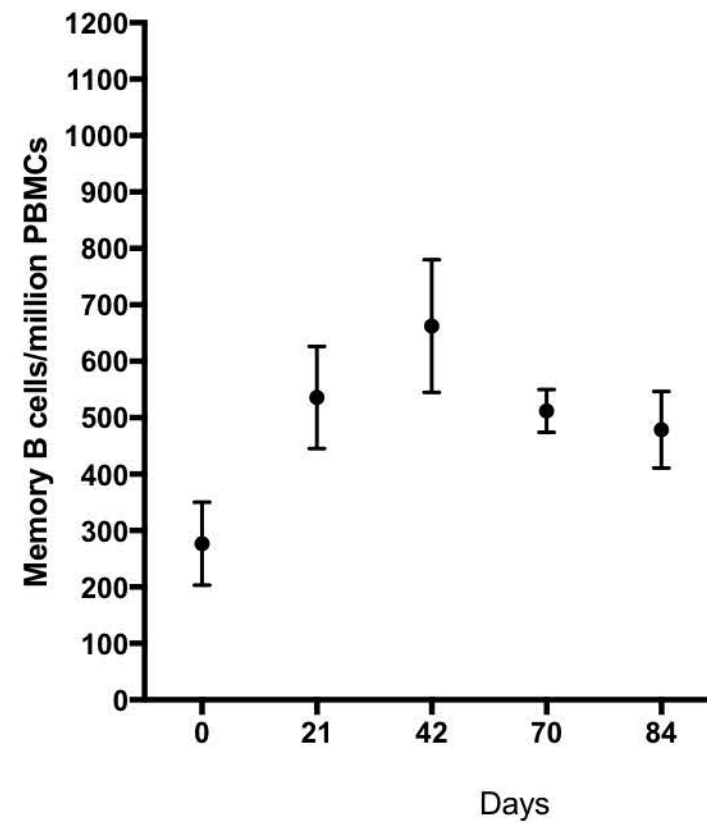

Supplement: 41598_2019_45461_MOESM1_ESM.pdf [file 41598_2019_45461_MOESM1_ESM.pdf]
